30 **Abstract**

31 Our conceptual understanding of immune-mediated interactions between parasites is  
32 rooted in the theory of community ecology. One of the limitations of this approach is that  
33 most of the theory and empirical evidence has focused on resource or immune-mediated  
34 parasite competition and yet, there is ample evidence of positive interactions between  
35 species that could be generated by immune-mediated facilitation. Here, we develop an  
36 immuno-epidemiological framework and apply it to longitudinal infection data of two  
37 gastrointestinal helminths that infect a population of free-living rabbits to investigate,  
38 through model testing, the mechanisms of immune-mediated facilitation in dual  
39 infections. Simulations show that weakened, species-specific IgA antibody responses  
40 and unequal, albeit low, IgA cross-reactions explain higher parasite intensities in dual  
41 compared to single infections, for both helminths. Simulations also show that rabbits with  
42 dual infections shed more free-living stages that survive for longer in the environment,  
43 implying greater onward transmission than hosts with single infections. These findings  
44 support the hypothesis that the two helminths interact through immune-mediated  
45 facilitation which contributes to greater fitness and the long-term co-circulation of both  
46 species in the host population.

47

48

49 **Keywords:** Intensity of infection, shedding, antibodies, cross-reaction, climate

## 50 **Introduction**

51 Interference between parasite species, mediated via the host's immune response, is one  
52 of the processes frequently proposed to explain interactions between different parasite  
53 species, or genetically diverse strains, that co-infect the same host [1-6]. In these  
54 instances, immunity is expected to preferentially target the more abundant or virulent  
55 parasite and, by reducing its intensity, attenuate the competition on the less abundant  
56 species. The two species can still co-exist, but their relative fitness depends on the net  
57 outcome of these interactions.

58

59 An alternative scenario to competition is where immune-mediated interactions lead to  
60 facilitation of either one or both of the co-infecting species [7] (figure 1). For example,  
61 many parasites can suppress or divert the immune response in favour of their own  
62 survival [8], and this action can benefit a second parasite species through a bystander  
63 effect [9,10]. Similarly, because of the polarization and function of different branches of  
64 the immune system, the response developed against one species can reduce or prevent  
65 the reaction against a co-infecting species [11-14]. In these interactions, the net benefit  
66 obtained from co-infection is asymmetrical (figure 1c). The facilitator parasite can control  
67 the immune response, or become its target, and in so doing facilitates the second  
68 parasite species that profits more than the facilitator, and consequently has greater  
69 fitness than when it is the sole parasite in the host. Symmetrical immune-mediated  
70 facilitation emerges when both parasite species benefit from their co-infections (figure  
71 1b). This can occur through the reduction, suppression or evasion of the immune  
72 response against each species, which gains both through greater vital rates and  
73 abundance [15-17]. Immune tolerance could be considered an extreme example of  
74 facilitation since the host immunity is engaged in repairing the injuries caused by the  
75 parasites rather than controlling the infections [18]. Importantly, under these scenarios a

76 parasite will have a selective advantage when it infects hosts already parasitized with  
77 the other species, so long as the facilitation is not so strong as to destabilize the  
78 interactions [19] or reduce host survival [20,21].

79

80 From an ecological perspective, the extent of immune-mediated parasite interaction is  
81 the outcome of two fundamental components. First, the immune response against one  
82 parasite species that is diverted to fight other parasites, e.g. the loss of specific  
83 antibodies that cross-react with other infections, and second, the immune constraints  
84 this parasite species experiences by the presence of other species, e.g. the effect of  
85 cross-reacting antibodies from other infections (figure 1*b,c*). Therefore, a positive net  
86 impact for each species, including any parasite manipulation of the immune reactions,  
87 would be expected to facilitate co-infections both within the host and among the co-  
88 circulating parasites at the host population level. Theory has shown that in the absence  
89 of strong competition between two parasite species, a weak immune-mediated  
90 symmetrical facilitation increases the virulence/abundance of both parasites, however,  
91 under stronger facilitation parasite growth escapes regulation and the system becomes  
92 destabilized [19].

93

94 To test for immune-mediated interactions leading to facilitation, we applied an immuno-  
95 epidemiological model to 23 years of infection data and asked whether the interaction  
96 between two helminths in dual infected hosts could be explained by immune facilitation,  
97 and whether there were positive consequences for parasite fitness, or onwards  
98 transmission, at the host population level. We used two helminth species,  
99 *Trichostrongylus retortaeformis* and *Graphidium strigosum*, that inhabit different  
100 gastrointestinal niches of the European rabbit (*Oryctolagus cuniculus*), the small  
101 intestine and stomach respectively, implying that they were unlikely to exhibit direct

102 competition. While both helminths cause chronic infections, *T. retortaeformis*, and less  
103 so *G. strigosum*, shows evidence of regulation of abundance and fecundity through host  
104 immunity [22-27]. Interestingly, field studies found higher intensities of the first and to a  
105 lesser extent the second in rabbits with both helminths, when compared to hosts with  
106 single infections [28,29], suggesting a possible positive interaction between the two  
107 species.

108

109 We investigated two hypotheses within the processes of immune regulation. If  
110 symmetrical facilitation is important, we should expect both helminth species from dual  
111 infections to experience reduced immune constraints and higher abundance and/or  
112 production of free-living stages, than parasites from single infections (figure 1b).  
113 However, if asymmetrical facilitation drives the interaction between the two species, then  
114 the dynamics for the facilitated parasite should be enhanced but the facilitator should not  
115 show substantial changes, when compared to single infections (figure 1c). In the  
116 opposite scenario of reduced dynamics, such as decreased intensity of infection and/or  
117 parasite fitness for one of both species, this should support immune-mediated  
118 interference.

119

120 We tested different candidate frameworks, and model selection was based on the ability  
121 of each model to describe the observed dynamics of infection, while identifying a  
122 parsimonious mechanism of host-parasite and parasite-parasite interactions. Since we  
123 are interested in processes of facilitation through host immunity, rather than competition,  
124 and given that the two helminths inhabit different gastrointestinal niches, parasite  
125 interference for host resources, including manipulation of host's metabolism or the  
126 interaction with the gut microbiome, were beyond the scope of this study.

127

128

## Material and Methods

129

### *The System*

130

Rabbits become chronically infected with the two helminths by eating herbage

131

contaminated with infective larvae; once in the host, larvae develop into adults that shed

132

eggs with the hosts' faeces (figure S1). Laboratory experiments showed that rabbits

133

develop a type 2 anti-inflammatory response against both species. However, while this

134

regulates both *T. retortaeformis* intensity and body growth, which then affects fecundity,

135

it appears to have a weaker effect against *G. strigosum* that maintains high intensities

136

throughout the infection [24-27]. A broader investigation of the immune profile in

137

experiments of infection and anthelmintic treatment found a down-regulation of genes

138

expressing type 1, type 2 and T-regulatory responses during reinfections with *G.*

139

*strigosum* and much less so with *T. retortaeformis*, both in single and dual infections

140

[23]. There was no evidence that *G. strigosum* contributed to this reduction, suggesting

141

that the host rather than the parasite was probably responsible for the observed immune

142

down-regulation [23]. The general conclusions that *T. retortaeformis*, and to a lesser

143

extent *G. strigosum*, is affected by host immunity were also proposed in field studies

144

[22,28-31].

145

146

The dynamics of the two helminths could also be negatively affected by ecological

147

processes of intra-specific competition for resources. Previous studies indicated that this

148

is probably not the main mechanism of regulation for *T. retortaeformis* but could play a

149

role for *G. strigosum*, especially at high abundances [26,31]. For example, rabbits

150

nutritionally constrained, through coprophagic restriction and on a fixed diet, carried the

151

same *T. retortaeformis* intensities as animals on a fixed diet only [32].

152

153 An important component of soil-transmitted helminths is the development and survival of  
154 eggs and larvae in the environment. Temperature and rainfall affect the survival of both  
155 *T. retortaeformis* and *G. strigosum* free-living stages [33-35] while at the host population  
156 level, climate and seasonality were found to be important for subsequent infection and  
157 thus parasite fitness [31].

158

159

### ***Model Datasets***

160 Here, we present the datasets and assumptions used for our mechanistic immuno-  
161 epidemiological model, while in the next section we describe the model framework. The  
162 study focused on a population of rabbits (population A) sampled monthly between 1980  
163 and 2002 from our site in Scotland. For every rabbit collected, the abundance of *T.*  
164 *retortaeformis* and *G. strigosum* was quantified by aliquots using standardized  
165 parasitological techniques [36]. We classified rabbits with one helminth species as  
166 single-infected and with both species as dual-infected. It is possible that some of the  
167 adults with single infections may have been previously infected with the other species  
168 that was subsequently eliminated. Rabbits do not appear to be able to clear *G.*  
169 *strigosum* [23-25,28,37] but old hosts can remove *T. retortaeformis* [24,27], although in  
170 endemic settings reinfection is relatively fast and the fraction of single infected hosts is  
171 really quite low; nevertheless, dubious cases were removed. To avoid interference with  
172 myxoma virus infection [11,28] rabbits with myxomatosis symptoms were excluded. Host  
173 age was arranged into eight classes, from age class 1 (one-month old) to age class 8  
174 (8+ months old) [22,28] and lifespan was considered to be about one year [38].

175

176 Population A provides 23 years of robust individual host data on the two helminths but  
177 lacks information on host immunity. Since our aim is to integrate the immune response  
178 of the rabbit with the dynamics of its parasites, we used data on serum antibody IgA and

179 IgG data obtained from a second rabbit population (population B) located ~5 kilometres  
180 away in a similar ecosystem and sampled for a much shorter time period (2004-2011),  
181 following the same standardized procedures as in population A [29]. Antibody data were  
182 available for six out of those eight years. Given its shorter time series of infection and  
183 following a preliminary investigation (SI-1.3 and 1.4), antibodies from population B were  
184 used to inform the parameterization of the immune response for the longer sampling of  
185 population A. This was based on similar dynamics of the two helminths (compare figure  
186 S2 with figure 2 and statistical results in SI-1.3 and 3.3) and the rabbits' age structure  
187 (SI-1.4) at the two populations.

188

189 We selected species-specific IgA antibodies to represent host immunity against each of  
190 the two helminths. Naturally, this is an over-simplification of the immune response, and it  
191 was determined by the following reasons. First, IgA is the most abundant  
192 immunoglobulin at mucosal surfaces, including the lamina propria of the gastrointestinal  
193 tract where it plays a critical role in the humoral response against gut infections [39].  
194 Second, IgA is an important contributor to the regulation of helminth abundance and vital  
195 rates [40-45], where the degree of protection is strongly affected by the host-helminth  
196 system and its history of infection [46-48]. In this system, we found that IgA (but not IgG)  
197 follows the dynamics of the two helminths, suggesting a rapid response and a  
198 reasonable representation of the immune response that does exhibit some regulatory  
199 properties but no long-term protection [23-27]. Third and most important, we needed a  
200 variable with an antigenic-specific immune response that could allow the quantification of  
201 separate reactions, namely species-specific and cross-reacting signals and, as such,  
202 would capture the essence of symmetric/asymmetric interactions, while avoiding  
203 additional complexities of adding extra variables and unnecessary assumptions. Our  
204 selection was also for a variable that could be easily quantified from large field datasets.



205 Moreover, antibodies are tractable model tools since we can select among different  
206 isotypes based on the parasite-specific relationship of interest.  
207  
208 Species-specific serum IgA was originally quantified using excretory/secretory products  
209 of adult parasites, as a source of antigen, and the enzyme-linked immunosorbent assay  
210 (ELISA) [29]. Tests of *in vitro* antibody performance and competitive abilities between  
211 the two helminths indicated good selective abilities to discriminate between the two  
212 helminths when they co-occur [29]. Despite these *in vitro* analyses, we did not exclude  
213 the possibility of antibody cross-reactivity, especially at high intensities of infection.  
214 Finally, weather variables on mean air temperature and relative humidity were collected  
215 daily from the nearby Hutton Institute (UK).

216

217

### **Model Framework**

218 We used a deterministic, age-structured, immuno-epidemiological model with climatic  
219 forcing, previously selected among different candidate models for this rabbit-helminth  
220 system [30,31]. The model was then expanded to analyse hosts with single and dual  
221 infections and to explicitly include the contribution of species-specific and cross-reacting  
222 IgA responses. The demography of the host population was also included. We assumed  
223 that the within-host helminth dynamic can be captured as:

224

$$225 \quad \frac{\partial P_i(a, t)}{\partial t} + \frac{\partial P_i(a, t)}{\partial a} = \Phi(a)F_i(t) \exp \left[ - \left( r_{ii}I_i(a) + r_{ij}I_j(a) \right) \right] (1 - P_i(a, t)/\delta_i)^+ - (\mu_i + \mu_H)P_i(a, t),$$

$$226 \quad \text{with } (1 - P_i(a, t)/\delta_i)^+ = \begin{cases} (1 - P_i(a, t)/\delta_i) & \text{if } (1 - P_i(a, t)/\delta_i) > 0 \\ 0 & \text{otherwise} \end{cases} \quad (\text{Eq. 1})$$

227

228 where: the intensity of infection (IOI) of the focal helminth  $P_i$  ( $i = T$  for *T. retortaeformis* or  
229  $i = G$  for *G. strigosum*), changes with host age,  $a$  in days, and time,  $t$ . The intensity of the

230 helminth-specific IgA response,  $I_i$ , changes with host age,  $a$ ;  $\Phi(a) = \Phi_0 \left( \frac{200+9a}{3340} \right)^\gamma$  is an  
231 allometric function describing the age-dependent host feeding rate, with  $\Phi_0$  and  $\gamma$  being  
232 suitable constants for each helminth species [30]. Given the similar IgA responses to  
233 infective third stage larvae (L3) and adults [24,25], and to avoid model redundancy, we  
234 focused on adults, assuming that there is no time delay from the ingestion of L3 to  
235 parasite maturation. The  $r$  parameters account for the effect of the immune response on  
236 the parasite intensity of infection, specifically,  $r_{ii}(a)$  is the age-dependent and species-  
237 specific IgA response that is stimulated by, and targets, parasite  $i$ , while  $r_{ji}(a)$  represents  
238 the age-dependent and species-specific IgA stimulated by parasite  $j$  ( $j \neq i$ ) that targets  
239 parasite  $i$  in dual-infected rabbits.  $r_{ii}$  and  $r_{ji}$  regulate the intensity of the stimulus triggered  
240 by the parasite; setting  $r_{ji}=0$  ( $j \neq i$ ) accounts for single infections. IgA is modelled to impact  
241 within-host parasite establishment and survival. Since the two helminths colonize  
242 different niches we did not consider direct inter-specific competition although we  
243 included the non-negative term  $(1 - P_i(a, t)/\delta_i)^+$ , which quantifies the intra-specific  
244 intensity-dependent effect on helminth establishment, with  $\delta_i$  representing the carrying  
245 capacity of helminth species  $i$ .  $\mu_i$  is the species-specific natural mortality rate of  
246 established parasites while  $\mu_H$  is the host natural mortality rate ( $\mu_H = 0.0069 \text{ days}^{-1}$ ) [38];  
247 the total mortality rate of parasites  $\mu$  includes both  $\mu_i$  and  $\mu_H$ .  
248  
249  $F_i(t)$  is the risk of infection (RI) of the host by parasite  $i$  and quantifies the density of free-  
250 living helminths available for infection on the herbage at time  $t$ .  $F_i(t)$  is driven by the  
251 intensity of infection in the host,  $P_i$ , and the linear effects of air temperature,  $\tau(t)$ , and  
252 relative humidity,  $H(t)$ , on the mortality of free-living stages,  $\mu_{Fi}(\tau(t), H(t))$  [31] as:  
253

$$254 \quad \frac{dF_i}{dt} = \alpha'_{pi} \int_{a_{min}}^{a_{max}} e^{-\mu_H a} f(t-a) P_i(a, t) da - \mu_{Fi}(\tau(t), H(t)) F_i \quad (\text{Eq. 2})$$

255

256 with  $\alpha'_{pi} = \alpha_{pi} s_i R$ . The quantity  $\alpha'_{pi}$  describes the rate at which eggs are shed by an  
257 infected host and includes the total annual recruitment of rabbits,  $R$ , into the host  
258 population, the total number of eggs shed by an adult parasite per unit of time,  $s_i$ ,  
259 independent of host age, and the survival of free-living stages,  $\alpha_{pi}$ . In the model, eggs  
260 hatch directly into infective stages to help reduce model complexity while retaining the  
261 fundamental biological characteristics of the system and the emphasis on the within-host  
262 processes, and yet permitting an estimate of parasite fitness. The relative impact of  
263 weather on the loss of free-living stages is set as:  $\mu_{Fi}(\tau(t), H(t)) =$   
264  $\alpha_{0i} - \alpha_{1\tau i} \tau(t) - \alpha_{1hi} H(t)$ , where  $\alpha_{0i}$  represents the baseline natural parasite mortality rate,  
265 while  $\alpha_{1\tau i}$  and  $\alpha_{1hi}$  depict changes in the mortality rates driven by temperature and  
266 humidity, respectively [31]. The proportional change of  $F_i(t)$  with the host intensity of  
267 infection is described by the term  $\int_{a_{min}}^{a_{max}} e^{-\mu_H a} f(t-a) P_i(a, t) da$ , where  $a_{max} = 283$  days  
268 is the maximum age of an individual recorded in the data and  $a_{min} = 30$  days, which is  
269 approximately the age when naïve rabbits switch from milk to herbage and are exposed  
270 to infective stages. The first age class of naïve rabbits is initiated by assigning a null  
271 intensity of both infection and IgA.  $F_i(t)$  explicitly depends on the age structure of the  
272 host population and thus, accounts for host reproduction,  $f(t)$ , the relative number of  
273 births at time  $t$ , and host survival,  $e^{-\mu_H a}$ , which represents the probability that rabbits are  
274 still alive at age  $a$ . We modelled  $f(t)$  as a beta probability density function calibrated  
275 against the fraction of 2-months old rabbits (SI-2.1). We assumed that infections with the  
276 two helminths occur through simultaneous ingestion, which is commonly expected in  
277 natural conditions; eggs are also shed simultaneously [29]. Table 1 summarizes the  
278 model variables and parameters.

279

280 As the framework (Eqs. 1 and 2) is rather complex, and to identify the model that  
281 represents the best compromise between complexity and data availability, we focused  
282 on population A dataset to quantify the functional relationships and fundamental  
283 mechanisms of helminth dynamics, and used population B for the details on the host  
284 immune response. The first nontrivial problem we faced was fitting the model to data  
285 from population A with all the observed combinations of helminth abundances in dual-  
286 infected rabbits, including changes in the proportion of hosts with single and dual  
287 infections over time. To reduce this computational difficulty, the rabbit population was  
288 grouped in four subsets of infection data and the model was independently fitted to  
289 individual rabbits from each of these subsets: i)- rabbits with *T. retortaeformis* and free of  
290 *G. strigosum*, ii)- rabbits with *G. strigosum* and free of *T. retortaeformis*; iii)- rabbits with  
291 both parasites but fitting to *T. retortaeformis* data only and iv)- rabbits with both parasites  
292 but fitting to *G. strigosum* data only. Animals free of both helminths at the time of  
293 sampling, i.e. not currently infected, were included in every subset to provide the naïve  
294 condition, once dubious cases were identified and removed.

295

296 A similar approach was used for assigning the IgA values to rabbits from population A.  
297 The IgA data from population B were initially grouped into the four subsets and, for each  
298 one, the continuous age-related immune values  $I_i(a)$  and  $I_j(a)$  were obtained by  
299 interpolating a 4<sup>th</sup> order polynomial function to the relationship between mean IgA and  
300 host age, weighted by sample size (figure S2a and b). Different smoothing functions  
301 were examined and the 4<sup>th</sup> order polynomial fitted well our data. Rabbits from population  
302 A were then assigned an interpolated IgA value according to their type of infection and  
303 age.

304

305 The second non-trivial problem was related to model selection [49] and the possible  
306 overfitting when using a model with many free parameters. We tested five hypothesis-  
307 driven models (three for single infections) that represented different mechanisms of  
308 parasite regulation: i)- no constraints and parasites are affected by birth-death  
309 processes, ii)- immune-mediated constraints through IgA responses, iii)- intra-specific  
310 intensity-dependent constraints for host's resources and, for the dual-infected hosts, we  
311 also examined iv)- cross-immunity via IgA responses (table 2). The complexity of the  
312 framework was explored by considering models that included these mechanisms in  
313 different combinations. Model selection and parameter calibration were performed  
314 independently for each of the four subsets using individual data from population A.

315

316 To increase model adherence to observed data the shape parameter  $\gamma$ , pertaining the  
317 rabbit's feeding rate,  $\Phi(a)$ , was initially tuned by fitting the most complex model (M2 for  
318 single and M4 for dual infections) to the annual mean intensities of infection by host age,  
319 simultaneously in single and dual infections of each helminth species. We then used this  
320 value for all the models, including the less complex ones. During model fitting,  $\gamma$  was  
321 kept fixed while all the other parameters were recalibrated to the individual data of each  
322 of the four subsets. The best-performing model formulation was selected using the  
323 Akaike Information Criterion [49] and the lowest AIC. To allow the system to reach  
324 regime conditions during calibration, the model was simulated for an initial warm-up of  
325 23-years that was then removed, full details of this procedure are reported elsewhere  
326 [31].

327

328 The numerical integration of the model was achieved using MATLAB® *ode45* solver  
329 function based on an explicit Runge-Kutta solution with adaptive time step size [50]. For  
330 each of the four subsets of data, we compared the empirical helminth intensity in every

331 rabbit to the expected intensity of infection by time and age of every host provided by the  
332 model output, assuming that the intensity of infection is distributed as a negative  
333 binomial [28] with age- and time-dependent mean  $P(a,t)$  and aggregation parameter  $k$ ,  
334 calibrated together with the model parameters [28]. The parameters combination that  
335 maximized the likelihood function was selected using a non-linear solver based on the  
336 Nelder-Mead simplex algorithm [51].

337

338 Finally, to provide a statistical measurement of the differences between single and dual  
339 infected rabbits, the model simulated quantities of interest, namely, intensity of infection,  
340 abundance of eggs shed, risk of infection (i.e. viable free-living stages) and antibody  
341 response, were compared using Generalized Linear Models (GLM, with normal or  
342 negative binomial distribution of errors). Type of infection (single or dual) was entered as  
343 categorical variable, while host age was included as a continuous variable. The additive  
344 effects and two-way interactions of the explanatory variables were examined. For  
345 consistency, the same analysis was repeated using the empirical data (SI-1.2).

346

347

## Results

348 Here we present simulations from the best selected model and parameter calibration on  
349 population A, the focus of our study. All the statistical results are reported in SI-3.

350

351

### *Epidemiology of Single and Dual infections*

352 The model that best described the four subsets of infection data comprised the species-  
353 specific IgA response and the intra-specific intensity-dependence for single infections,  
354 dual infections also included IgA cross-reaction between the two helminths (table 2, SI-  
355 3.1). Individual-based simulations captured the average trends of infection by host age  
356 (figure 2), but less so the large intra-annual variation observed in the empirical data

357 (figure S6). For both helminths the simulated intensities by host age were significantly  
358 higher in rabbits with dual than single infections (table S3). *T. retortaeformis* rapidly  
359 accumulated with host age and maintains high intensities in older rabbits (figure 2a),  
360 while accumulation of *G. strigosum* intensities was slower (figure 2b). Consistent with  
361 these model results, the empirical intensities of infection by host age were significantly  
362 higher in rabbits with dual than single infection, for both helminths (figure 2, table S3).

363

### 364 ***Immune response and Immune-mediated parasite facilitation***

365 The estimation of immunological parameters yields information on the immunological  
366 mechanism that could generate the epidemiological patterns observed. Simulations  
367 indicate that the stimulus to develop a specific IgA response to *T. retortaeformis* is  
368 stronger in rabbits with single than dual infections ( $r_{TT} = 0.734$  vs  $0.338$ , table 3). In this  
369 latter group, the cross-reaction stimulus for a specific IgA response against *G. strigosum*  
370 that also attacks *T. retortaeformis* is essentially null ( $r_{GT} = 0.00016$ ). The projected  
371 relationships between intensity of infection and IgA stimuli indicate that a proportional  
372 increase in the specific IgA stimulus ( $r_{TT}$ ) will reduce *T. retortaeformis* intensities, while  
373 the stimulus for an IgA response to *G. strigosum* that cross-reacts with *T. retortaeformis*  
374 ( $r_{GT}$ ) remains extremely weak and will have no impact on this helminth (figure 3a). When  
375 we consider the estimated species-specific antibody response against *T. retortaeformis*,  
376  $r_{TTI}$ , values are significantly lower in dual than single infection, and for rabbits of all age  
377 groups (figure 4a, table S4). These results suggest that the higher *T. retortaeformis*  
378 intensities in dual-infected hosts are caused by the weakening of the stimulus to a  
379 specific IgA response that is diverted against *G. strigosum* (also see below) and a  
380 negligible immune-mediated interference by this latter helminth in the form of a weak  
381 cross-reaction,  $r_{GTI}$ . We note that, while empirical data only quantify specific IgA's, the  
382 model allows us to quantify both the species-specific ( $r_{iIi}$ ) and the cross-reactive ( $r_{jIi}$ )

383 relative strength of IgA, namely the effect of an increase (or decrease) of IgA on the  
384 intensity of infection.

385

386 The intra-specific carrying capacity,  $\delta$ , is higher in rabbits with dual than single infections  
387 (789.74 vs 651.6, respectively, table 3) supporting the lower intensity-dependent control  
388 in this latter group.

389

390 For *G. strigosum*, simulations showed that the stimulus to develop a specific IgA  
391 response is low (table 3), and lower in rabbits with single ( $r_{GG}= 0.121$ ) than dual infection  
392 ( $r_{GG}= 0.208$ ). The stimulus for an IgA response specific to *T. retortaeformis* that cross-  
393 reacts against *G. strigosum* is four times higher ( $r_{TG}= 0.804$ ), implying interference from  
394 this helminth. Moreover, the investigation of how *G. strigosum* intensities will change in  
395 relation to changes in the antibody stimuli indicates that the simulated intensities will  
396 decline with a proportional increase of  $r_{TG}$  and less so of  $r_{GG}$  (figure 3b). Examination of  
397 the estimated antibody response,  $r_{GG}I$ , by host age showed that values are significantly  
398 higher in rabbits with dual than single infections (figure 4b, table S4), although it is  
399 important to observe that these values remain consistently low. All together, these  
400 findings suggest that dual-infected rabbits should control *G. strigosum* more successfully  
401 than single-infected hosts. However, the generally low IgA response, even for the cross-  
402 reaction, could explain the significantly higher intensities observed in dual-infected hosts  
403 (table S3).

404

405 Previous studies proposed that intensity-dependence could be more important for the  
406 dynamics of this parasite [31]. Our simulations indicate that parasite carrying capacity is  
407 slightly higher in hosts with dual than single infections ( $\delta= 83.45$  and 78.71, respectively,



408 table 3), suggesting the tendency for weaker restrictions of *G. strigosum* intensities in  
409 this latter group, as previously noted for *T. retortaeformis*.

410

411 Collectively, the weakening or fundamentally low IgA responses, and the resulting higher  
412 intensities of both helminths in dual infections, support the hypothesis of immune-  
413 mediated facilitation between the two species. These higher intensities are generated  
414 despite a clear uneven in the immune response against the two helminths.

415

### 416 ***Parasite fitness and Risk of infection***

417 Given the soil-transmitted nature of *T. retortaeformis* and *G. strigosum*, the density of  
418 viable free-living stages on the pasture represents the risk of infection for hosts exposed  
419 to these stages, and can be considered a proxy for onward transmission and parasite  
420 fitness. The density of free-living stages is the sum of the abundance of eggs shed by  
421 every host and their mortality rate. We used simulation results to examine whether  
422 parasite immune-mediated facilitation has symmetrical or asymmetrical consequences  
423 for parasite fitness. The estimated abundance of eggs shed on the pasture is  
424 significantly higher in rabbits with dual than single infections, for both helminths (table  
425 S5). Eggs shedding peaks in young and a decrease in older animals for *T. retortaeformis*  
426 while there is a constant increase with host age for *G. strigosum* (figure S7a,b).

427

428 On the herbage, the population of free-living stages is affected by environmental factors  
429 (biotic and abiotic) with higher mortalities for *T. retortaeformis* than *G. strigosum* (table  
430 3). Throughout the study period, the mortality rate of free-living stages produced by  
431 rabbits with single and dual infections is, respectively:  $\mu_{FT} = 3.52$  and  $1.58 \text{ day}^{-1}$  for *T.*  
432 *retortaeformis* and  $\mu_{FG} = 0.009$  and  $0.003 \text{ days}^{-1}$  for *G. strigosum*. Part of this loss is

433 driven by weather: temperature has a strong impact on *T. retortaeformis* ( $\alpha_{1\tau} = 0.445$   
434 and 0.207 for single and dual infections, respectively) while humidity is more relevant to  
435 *G. strigosum* ( $\alpha_{1H} = 0.004$  and 0.002). The ecological differences between the two  
436 helminths are also clear from the baseline natural mortality rate of free-living stages,  $\alpha_0$ ,  
437 which is a component of  $\mu_{Fi}$ . Mortality is higher for *T. retortaeformis* ( $\alpha_0 = 7.39$  and 3.60  
438 for single and dual infections, respectively) than for *G. strigosum* ( $\alpha_0 = 0.328$  and 0.194),  
439 indicating that larvae are on the pasture for a shorter period of time for the former  
440 helminth. More important, simulations suggest that under analogous environmental  
441 conditions, free-living stages from both helminths experience lower natural and climate-  
442 driven mortality, and thus remain available for onward transmission for longer, when  
443 derived from rabbits with dual infections (compare  $\alpha_0$  and  $\mu_{Fi}$  from single and dual  
444 infections).

445

446 There is strong seasonality in the accumulation of free-living stages on the herbage, and  
447 hence the risk of infection (figure 5). *T. retortaeformis* accumulation is at the highest in  
448 August primarily through the shedding of young and newly infected rabbits and drops in  
449 June, coinciding with the peak of newly born rabbits (figure S3). *G. strigosum* shows the  
450 highest densities around March, when the population is composed predominantly of  
451 adults and the lowest around July, especially for dual infected hosts, with the arrival of  
452 newborn hosts. In both cases, rabbits dual-infected generate significantly more viable  
453 free-living stages throughout the year, than single-infected rabbits (table S6). Therefore,  
454 while differences between the two helminths are expected because of their ecological  
455 characteristics, both *T. retortaeformis* and *G. strigosum* from dual-infected rabbits exhibit  
456 significantly higher fitness, including higher intensities of infection, than helminths from

457 single infections, supporting the hypothesis of symmetrical immune-mediated facilitation  
458 between the two parasites.

459

460

## Discussion

461 We applied an immuno-epidemiological model to empirical data of two helminths from a  
462 population of rabbits and the findings support the hypothesis that immune-mediated  
463 facilitation can explain *T. retortaeformis* and *G. strigosum* higher intensities in rabbits  
464 with dual compared to single infections. Dual infections are facilitated by weakened  
465 species-specific IgA responses and unequal IgA cross reactions. Our multi-scale  
466 approach also suggests a symmetrical immune-mediated facilitation where weak IgA  
467 stimuli contribute to greater number of eggs shed and higher survival of the free-living  
468 stages, and thus higher transmission, when compared to parasites derived from hosts  
469 with single infections. Given that rabbits with dual infections represent the large majority  
470 of the sampled population (figure S4), the dynamics of the two helminths is primarily  
471 driven by this group of hosts.

472

473 Cross-immunity, where protection to one species provides some defence against a  
474 second species, has been proposed in a variety of systems [e.g. 1-3,6,52]. Our study  
475 offers novel insights by showing that, although some immune-mediated interference  
476 between two helminths is likely to occur, IgA cross-reacts disproportionately and has  
477 small impact on parasite intensity, it is essentially null against *T. retortaeformis* and has  
478 a low effect against *G. strigosum*. This pattern is consistent with theoretical work  
479 showing that two parasites will increase abundance and persist in the host if immune-  
480 mediated facilitation is not too strong to destabilize the system [19]. The evidence in  
481 animal systems of positive interactions between parasite species [1,2,53], suggests

482 some level of immune-mediated facilitation, irrespective of the specific immune  
483 mechanism involved. Examples of facilitation through host immunity have been  
484 frequently described for HIV associated co-infections in humans, such as HIV-malaria or  
485 HIV-Tb [58,59]. Positive interactions between micro- and macro-parasites, mediated by  
486 trade-offs in the immune functions and responses, are expected to benefit one or both  
487 parasites [11,13]. For helminth co-infections, synergistic effects could emerge  
488 throughout diverse processes; for example, the allocation of IgE against helminth  
489 species could help explain the positive correlation between *Ascaris lumbricoides* and  
490 both *Trichuris trichiura* and hookworm infections in humans (15, 54-56). Similarly, the co-  
491 circulation of *Trichostrongylus* spp., *Haemonchus contortus* and *Teladorsagia*  
492 *circumcincta* in domestic and wild animal populations is facilitated by their immuno-  
493 modulatory properties [57] and could be complemented by asymmetric immune  
494 reactions.

495

496 We can expect that one of the consequences of immune-mediated facilitation will be  
497 greater parasite fitness. We found that rabbits with dual-infections contribute to a larger  
498 number of free-living stages that are available for onward transmission, than did rabbits  
499 with single infection. Our model did not explicitly quantify the relationships between IgA  
500 and parasite size or fecundity, where both fecundity and shedding are directly related to  
501 parasite body length [23,29], but coupled shedding to infection intensity, which is then  
502 modulated by IgA. Some of these relationships were previously examined and showed a  
503 negative relationship between IgA and *G. strigosum* body length in single infections and  
504 between IgA and *T. retortaeformis* body length or abundance in co-infections [23]. A  
505 combination of positive and negative relationships was also found between the vital  
506 rates of both helminths and type 1, type 2 and T-regulatory immune variables [23],  
507 confirming the complex interactions between parasite demography and the host immune

508 response. Indeed, the immune response to an infection is the results of a large number  
509 of functions and factors, each of which has distinct roles and degree of specificity. Our  
510 model framework describes a small constituent of this immune network, and gratifyingly  
511 captured the effects, while other immune processes could also have potentially  
512 contributed to the weaker net response of dual infected rabbits. More broadly, our results  
513 are consistent with studies from other systems on the importance of IgA to helminth  
514 growth, fecundity and shedding [60-63].

515

516 In addition to the diverse tolerance of the two helminths to weather [33-35], the higher  
517 natural mortality of *T. retortaeformis* on the pasture is probably associated with the faster  
518 life history of this parasite, namely, faster egg hatching rate [34] and faster within-host  
519 maturation [64], when compared to *G. strigosum* [65]. Crucially, free-living stages  
520 derived from rabbits with dual infections exhibited longer survival leading to higher  
521 probability of onwards transmission. Laboratory studies showed that fewer antibodies  
522 bind to eggs of *T. retortaeformis* than *G. strigosum*, and egg volume decreases for the  
523 first and increases for the second during a single-dose infection experiment [66]. While  
524 there was no clear evidence that antibodies altered egg size or hatchability, the impact  
525 could be relevant in natural settings, when both the host and the helminths are under  
526 environmental constraints. For instance, the low IgA specific response to *T.*  
527 *retortaeformis* in hosts with dual-infections could lead to eggs of higher quality, such as  
528 larger size or more tolerant to thermal changes, by females in better conditions. For *G.*  
529 *strigosum* the mechanism is less clear but could also be related to improved female  
530 conditions and enhanced egg quality with better tolerance to moisture variation.

531

532 Our data-informed modelling approach contributes to advances in the understanding of  
533 immune-mediated facilitation on infection and transmission. The mechanistic

534 understanding of these processes, and the contribution to parasite dynamics and fitness,  
535 is still limited and in great need of empirical evidence. There is also a need to improve  
536 the realism of modelling multiple infections, particularly for macro-parasites. The  
537 proposed framework can be adapted to test alternative and more complex immune-  
538 mediated formulations beyond the species examined in this study. *T. retortaeformis* and  
539 *G. strigosum* share similarities with other gastrointestinal helminths of animals, including  
540 human parasites, and our findings have relevance across a broad range of ecological  
541 settings. The fundamental challenge is to identify the key variables that can clarify the  
542 mechanisms of regulation across scales and influences parasite fitness. Gathering this  
543 information can be daunting but is a prerequisite for laying the foundation of a better  
544 understanding of the ecological role of co-infection in disease spread and persistence,  
545 which is essential for developing control measures tailored on these groups of hosts.

546

#### 547 **Acknowledgments**

548 This study was supported by the National Science Foundation (DEB-1145697). FD was  
549 partially sponsored by The Ermenegildo Zegna Founder's Scholarship. We are grateful  
550 to Tricia Brockman for creating figure S1.

551

#### 552 **Ethic statement**

553 We used rabbit data already available from previous studies where sampling was performed  
554 according to field procedures approved by the Institutional Animal Care and Use Committee of  
555 The Pennsylvania State University (IACUC # 26383 and 34489). All animal work adhered to the  
556 guidelines laid out in the Guide for the Care and Use of Laboratory Animals. 8th ed. National  
557 Research Council of the National Academies. National Academies Press Washington DC.

558

#### 559 **References**

- 560 1. Cox, F.E.G. 2001. Concomitant infections, parasites and immune responses.  
561 *Parasitology* 122, S23-S38.
- 562 2. Christensen, N.Ø., P. Nansen, B.O. Fagbemi and J. Monrad. 1987. Heterologous  
563 antagonistic and synergistic interactions between helminths and between helminths

- 564 and protozoans in concurrent experimental infection of mammalian hosts. *Parasit.*  
565 *Res.* 73, 387-410.
- 566 3. Lee, T.D.G., R. K. Grencis and D. Wakelin. 1982. Specific cross-immunity between  
567 *Trichinella spiralis* and *Trichuris muris*: immunization with heterologous infections  
568 and antigens and transfer of immunity with heterologous immune mesenteric lymph  
569 node cells. *Parasitology* 84, 381-389.
- 570 4. Gupta, S., J. Swinton, and R.M. Anderson. 1994. Theoretical studies of the effects of  
571 heterogeneity in the parasite population on the transmission dynamics of malaria.  
572 *Proc. R. Soc. B.* 256, 231-238.
- 573 5. Råberg, L., J.C. De Roode, A.S. Bell, P. Stamou, D. Gray, and A.F. Read. 2006. The  
574 role of immune-mediated apparent competition in genetically diverse malaria  
575 infections. *Am. Nat.* 168, 41-53.
- 576 6. Bhattacharyya, S., P.H. Gesteland, K. Korgenski, O.N. Bjørnstad, and F.R. Adler.  
577 2015. Cross-immunity between strains explains the dynamical pattern of  
578 paramyxoviruses. *PNAS* 112, 13396-13400.
- 579 7. Zélé, F., S. Magalhães, S. Kéfi, and A.B. Duncan. 2018. Ecology and evolution of  
580 facilitation among symbionts. *Nat. Com.* 9, 4869.
- 581 8. McSorley, H.J. and Maizels, R.M., 2012. Helminth infections and host immune  
582 regulation. *Clin. Microbiol. Rev.* 25, 585-608.
- 583 9. Behnke, J.M., Wahid, F.N., Grencis, R.K., Else, K.J., Ben-Smith, A.W. and Goyal,  
584 P.K., 1993. Immunological relationships during primary infection with  
585 *Heligmosomoides polygyrus* (*Nematospiroides dubius*): downregulation of specific  
586 cytokine secretion (IL-9 and IL-10) correlates with poor mastocytosis and chronic  
587 survival of adult worms. *Parasi. Immunol.* 15, 415-421.
- 588 10. Genta, R.M. and Walzer, P.D., 1989. Strongyloidiasis. In *Parasitic Infections in the*  
589 *Compromised Host* (ed. Walzer, P. D. & Genta, R. M.), pp. 463–525. New York:  
590 Marcel Dekker.
- 591 11. Cattadori, I.M., R. Albert, and B. Boag. 2007. Variation in host susceptibility and  
592 infectiousness generated by co-infection: the myxoma–*Trichostrongylus*  
593 *retortaeformis* case in wild rabbits. *J.R.S. Interface* 4, 831-840.
- 594 12. Bickle, Q. D., Solum, J., & Helmbly, H. (2008). Chronic intestinal nematode infection  
595 exacerbates experimental *Schistosoma mansoni* infection. *Infect. Immun.* 76, 5802–  
596 5809.



- 597 13. Graham A. 2008. Ecological rules governing helminth–microparasite coinfection.  
598 *PNAS* 105, 566-570.
- 599 14. Onah D.N. and Wakelin D., 1999. Trypanosome-induced suppression of responses  
600 to *Trichinella spiralis* in vaccinated mice. *Int. J. Parasit.* 29, 1017-1026.
- 601 15. Fleming, F.M., S. Brooker, S.M. Geiger, I.R. Caldas, R. Correa-Oliveira, P.J. Hotez,  
602 and J.M. Bethony. 2006. Synergistic associations between hookworm and other  
603 helminth species in a rural community in Brazil. *Trop. Med. Intern. Health* 11, 56-64.
- 604 16. Diedrich C.R. and J.L. Flynn 2011. HIV-1/mycobacterium tuberculosis coinfection  
605 immunology: how does HIV-1 exacerbate tuberculosis? *Infect. Immun.* 79, 1407-  
606 1417.
- 607 17. Shi, K., Li, H., Guo, X., Ge, X., Jia, H., Zheng, S. and Yang, H., 2008. Changes in  
608 peripheral blood leukocyte subpopulations in piglets co-infected experimentally with  
609 porcine reproductive and respiratory syndrome virus and porcine circovirus type  
610 2. *Vet. Microbiol.* 129, 367-377.
- 611 18. Soares M.P., Teixeira L. and Moita L.F., 2017. Disease tolerance and immunity in  
612 host protection against infection. *Nat. Rev. Immunol.* 17, 83-96.
- 613 19. Eswarappa, S.M., S. Estrela and S.P. Brown. 2012. Within-host dynamics of multi-  
614 species infections: facilitation, competition and virulence. *PLoS One* 7: 38730.
- 615 20. Kamiya, T., N. Mideo, and S. Alizon. 2018. Coevolution of virulence and  
616 immunosuppression in multiple infections. *J. Evol. Biol.* 31, 995-1005.
- 617 21. Tillmann, H.L., Heiken, H., Knapik-Botor, A., Heringlake, S., Ockenga, J., Wilber,  
618 J.C., Goergen, B., Detmer, J., McMorrow, M., Stoll, M. and Schmidt, R.E., 2001.  
619 Infection with GB virus C and reduced mortality among HIV-infected patients. *New*  
620 *Engl. J. Med.*, 345, 715-724.
- 621 22. Cattadori, I.M., B. Boag, O.N. Bjørnstad, S. Cornell, and P.J. Hudson. 2005. Peak  
622 shift and epidemiology in a seasonal host-nematode system. *Proc. R. Soc. B.* 272,  
623 1163–1169.
- 624 23. Cattadori I.M., A.K. Pathak and M.J. Ferrari. 2019. External Disturbances Impact  
625 Helminth-Host Interactions by affecting Dynamics of Infection, Parasite Traits and  
626 Host Immune Responses. *Ecol. Evol.* 9, 13495-13505.
- 627 24. Murphy, L., N. Nalpas, M. Stear, and I.M. Cattadori. 2011. Explaining patterns of  
628 infection in free living populations using laboratory immune experiments. *Paras.*  
629 *Immunol.* 33, 287-302.



- 630 25. Murphy, L., A.K. Pathak, and I.M. Cattadori. 2013. A co-infection with two  
631 gastrointestinal nematodes alters host immune responses and only partially parasite  
632 dynamics. *Paras.Immunol.* 35, 421-432.
- 633 26. Vanalli C., L. Mari, R. Righetto, R. Casagrandi, M. Gatto, and I.M. Cattadori. 2020  
634 Within-host mechanisms of immune regulation explain the contrasting dynamics of  
635 two helminth species in both single and dual infections. *Plos Comp. Biol.* 16,  
636 p.e1008438.
- 637 27. Thakar, J., A.K. Pathak, L. Murphy, R. Albert, and I.M. Cattadori. 2012. Network  
638 model of immune responses reveals key effectors to single and co-infection  
639 dynamics by a respiratory bacterium and a gastrointestinal helminth. *PLoS Comp.*  
640 *Biol.* 8, p.e1002345.
- 641 28. Cattadori, I.M., B. Boag, and P.J. Hudson. 2008. Parasite coinfection and interaction  
642 as drivers of host heterogeneity. *Int. J. Parasit.* 38, 371–380.
- 643 29. Cattadori, I.M., B.R. Wagner, L.A. Wodzinski, A.K. Pathak, A. Poole, and B. Boag.  
644 2014. Infections do not predict shedding in co-infections with two helminths from a  
645 natural system. *Ecology* 95, 1684-1692.
- 646 30. Cornell, S.J., O.N. Bjornstad, I.M. Cattadori, B. Boag, and P.J. Hudson. 2008.  
647 Seasonality, cohort-dependence and the development of immunity in a natural host–  
648 nematode system. *Proc. R. Soc. B* 275, 511-518.
- 649 31. Mignatti, A., B. Boag, and I.M. Cattadori. 2016. Host immunity shapes the impact of  
650 climate changes on the dynamics of two parasite infections. *PNAS* 113, 2970–2975.
- 651 32. Cattadori, I.M., A. Sebastian, H. Hao, K. Katani, I. Albert, K.E. Eilertson, V. Kapur, A.  
652 Pathak and S. Mitchell. 2016. Impact of helminth infections and nutritional constraints  
653 on the small intestine microbiota. *PLoS One* 11, 0159770.
- 654 33. Boag, B., and R.J. Thomas. 1970. The development and survival of free-living stages  
655 of *Trichostrongylus colubriformis* and *Ostertagia circumcincta* on pasture. *Res. Vet.*  
656 *Sci.* 11, 380-381.
- 657 34. Hernandez, A.D., A. Poole, and I.M. Cattadori. 2013. Climate changes influence free-  
658 living stages of soil-transmitted parasites of European rabbits. *Glob. Change Biol.* 19,  
659 1028-1042.
- 660 35. Gupta, S.P. 1961. The effects of temperature on the survival and development of the  
661 free-living stages of *Trichostrongylus retortaeformis* Zeder (Nematoda). *Can. J. Zool.*  
662 391, 47–53.

- 663 36. Boag, B. 1985. The incidence of helminth parasites from the wild rabbit *Oryctolagus*  
664 *cuniculus* (L.) in Eastern Scotland. *J. Helminth.* 59, 61-69.
- 665 37. Pathak, A.K., C. Pelensky, B. Boag, and I.M. Cattadori. 2012. Immuno-epidemiology  
666 of chronic bacterial and helminth co-infections: observations from the field and  
667 evidence from the laboratory. *Int. J. Parasit.* 42, 647-655.
- 668 38. Smith, G.C., and R.C. Trout. 1994. Using Leslie matrices to determine wild rabbit  
669 population growth and the potential for control. *J. Appl. Ecol.* 31, 223-230.
- 670 39. Mestecky, J. and McGhee, J.R., 1987. Immunoglobulin A (IgA): molecular and  
671 cellular interactions involved in IgA biosynthesis and immune response. *Adv.*  
672 *Immunol.* 40, 153-245.
- 673 40. Sorobetea, D., M. Svensson-Frej, and R. Grencis. 2018. Immunity to gastrointestinal  
674 nematode infections. *Muc. Immunol.* 11, 304–315.
- 675 41. Ben-Smith, A., Wahid, F.N., Lammas, D.A. and Behnke, J.M., 1999. The relationship  
676 between circulating and intestinal *Heligmosomoides polygyrus*-specific IgG1 and IgA  
677 and resistance to primary infection. *Paras. Immunol.* 21, 383-396.
- 678 42. Van Knapen, F., J.H. Franchimont, A.R. Verdonk, J. Stumpf, and K. Undeutsch.  
679 1982. Detection of specific immunoglobulins (IgG, IgM, IgA, IgE) and total IgE levels  
680 in human trichinosis by means of the enzyme-linked immunosorbent assay (ELISA).  
681 *Am. J. Trop. Med. Hyg.* 31, 973-976.
- 682 43. Clerc, M., Devevey, G., Fenton, A. and Pedersen, A.B., 2018. Antibodies and  
683 coinfection drive variation in nematode burdens in wild mice. *Int. J. Parasit.* 48, 785-  
684 792.
- 685 44. Escribano, C., Saravia, A., Costa, M., Castells, D., Ciappesoni, G., Riet-Correa, F.  
686 and Freire, T., 2019. Resistance to *Haemonchus contortus* in Corriedale sheep is  
687 associated to high parasite-specific IgA titer and a systemic Th2 immune  
688 response. *Sci. Rep.*, 9, 1-10.
- 689 45. Inaba T, et al. 2003. Monoclonal IgA antibody-mediated expulsion of *Trichinella* from  
690 the intestine of mice. *Parasitology* 126, 591–598.
- 691 46. Esser-von Bieren, J., I. Mosconi, R. Guiet, A. Piersgilli, B. Volpe, F. Chen, W.C.  
692 Gause, A. Seitz, J.S. Verbeek, and N.L. Harris. 2013. Antibodies trap tissue  
693 migrating helminth larvae and prevent tissue damage by driving IL-4R $\alpha$ -independent  
694 alternative differentiation of macrophages. *PLoS Pathog.* 9, e1003771.
- 695 47. McCoy, K.D., M. Stoel, R. Stettler, P. Merky, K. Fink, B.M. Senn, C. Schaer, J.  
696 Massacand, B. Odermatt, H.C. Oettgen, and R.M. Zinkernagel. 2008. Polyclonal and

- 697 specific antibodies mediate protective immunity against enteric helminth infection.  
698 *Cell Host Microb.* 4, 362-373.
- 699 48. Roach, T.I.A., K.J. Else, D. Wakelin, D.J. McLaren, and R.K. Grencis. 1991. *Trichuris*  
700 *muris*: antigen recognition and transfer of immunity in mice by IgA monoclonal  
701 antibodies. *Paras. Immunol.* 13, 1–12.
- 702 49. Burnham, K.P., and D.R. Anderson. 2002. *Model selection and multimodel inference:*  
703 *a practical information-theoretic approach*. Springer, New York.
- 704 50. Dormand, J.R. and P.J. Prince. 1980. A family of embedded Runge-Kutta formulae.  
705 *J. Comp. Appl. Math.* 6, 19-26.
- 706 51. Lagarias, J.C., J.A. Reeds, M.H. Wright, and P.E. Wright. 1998. Convergence  
707 properties of the Nelder-Mead simplex method in low dimensions. *SIAM J. Optim.* 9,  
708 112-147.
- 709 52. Johnson, P.T. and I.D. Buller. 2011. Parasite competition hidden by correlated  
710 coinfection: using surveys and experiments to understand parasite interactions.  
711 *Ecology* 92, 535-541.
- 712 53. Petney, T.N. and R.H. Andrews. 1998. Multiparasite communities in animals and  
713 humans: frequency, structure and pathogenic significance. *Int. J. Parasit.* 28, 377-  
714 393.
- 715 54. Booth, M., and D.A.P. Bundy. 1992. Comparative prevalences of *Ascaris*  
716 *lumbricoides*, *Trichuris trichiura* and hookworm infections and the prospects for  
717 combined control. *Parasitology* 105, 151-157.
- 718 55. Geiger, S.M., N.D.E. Alexander, R.T. Fujiwara, S. Brooker, B. Cundill, D.J. Diemert,  
719 R. Correa-Oliveira, and J.M. Bethony. 2011. *Necator americanus* and helminth co-  
720 infections: further down-modulation of hookworm-specific type 1 immune  
721 responses. *PLoS Negl. Trop. Dis.* 5, p.e1280.
- 722 56. Lepper, H.C., J.M. Prada, E.L. Davis, S.A. Gunawardena, and T.D. Hollingsworth.  
723 2018. Complex interactions in soil-transmitted helminth co-infections from a cross-  
724 sectional study in Sri Lanka. *Trans. R. Soc. Trop. Med. Hyg.* 112, 397-404.
- 725 57. McNeilly, T.N., and A.J. Nisbet. 2014. Immune modulation by helminth parasites of  
726 ruminants: implications for vaccine development and host immune competence.  
727 *Parasite* 21.
- 728 58. Abu-Raddad, L.J., Patnaik, P. and Kublin, J.G., 2006. Dual infection with HIV and  
729 malaria fuels the spread of both diseases in sub-Saharan Africa. *Science* 314, 1603-  
730 1606.

- 731 59. Kwan, C.K. and J.D. Ernst. 2011. HIV and tuberculosis: a deadly human syndemic.  
732 *Clin. Microb. Rev.* 24, 351-376.
- 733 60. Stear, M.J., S.C. Bishop, M. Doligalska, J.L. Duncan, P.H. Holmes, J. Irvine, L.  
734 McCririe, Q.A. McKellar, E. Sinski, and M.A.X. Murray. 1995. Regulation of egg  
735 production, worm burden, worm length and worm fecundity by host responses in  
736 sheep infected with *Ostertagia circumcincta*. *Parasit. Immunol.* 17, 643-652.
- 737 61. Strain, S., S. Bishop, N. Henderson, A. Kerr, Q. Mackellar, S. Mitchell, and M. Stear.  
738 2002. The genetic control of IgA against *Teladorsagia circumcincta* and its association  
739 with parasite resistance in naturally infected sheep. *Parasitology* 124, 545-522.
- 740 62. Henderson, N.G., and M.C. Stear. 2006. Eosinophil and IgA responses in sheep  
741 infected with *Teladorsagia circumcincta*. *Vet. Immunol. Immunopath.* 112, 62-66.
- 742 63. McRae, K.M., M.J. Stear, B. Good, and O.M. Keane. 2015. The host immune  
743 response to gastrointestinal nematode infection in sheep. *Paras. Immunol.* 37, 605-  
744 613.
- 745 64. Audebert, F., H. Hoste, and M.C. Durette-Desset. 2002. Life cycle of  
746 *Trichostrongylus retortaeformis* in its natural host, the rabbit (*Oryctolagus cuniculus*).  
747 *J. Helminth.* 76, 189-192.
- 748 65. Massoni, J., J. Cassone, M.C. Durette-Desset, and F. Audebert. 2011. Development  
749 of *Graphidium strigosum* (Nematoda, Haemonchidae) in its natural host, the rabbit  
750 (*Oryctolagus cuniculus*) and comparison with several Haemonchidae parasites of  
751 ruminants. *Parasit. Res.* 109, 25-36.
- 752 66. Lambert, K., A.K. Pathak. and I.M. Cattadori. 2005. Does host immunity influence  
753 hatchability of helminth eggs shed in the environment? *J. Helminth.* 89, 446–452.

754 **Table 1.** Variable and parameter definitions, and their units for model equations 1 and 2.

755 The symbols  $a$  and  $t$  represent age and time in days.

756

| Variable/<br>parameter | Definition                                                                                  | Unit                                                          |
|------------------------|---------------------------------------------------------------------------------------------|---------------------------------------------------------------|
| $P(a,t)$               | Intensity of infection                                                                      | parasites * rabbit <sup>-1</sup>                              |
| $F(t)$                 | Risk of infection                                                                           | parasites * (grass unit) <sup>-1</sup>                        |
| $\Phi(a)$              | Age-dependent host feeding rate                                                             | grass unit * (day * rabbit) <sup>-1</sup>                     |
| $l(a)$                 | Age-dependent host immune response                                                          | -                                                             |
| $\gamma$               | Allometric exponent of the host feeding rate                                                | -                                                             |
| $\Phi_0$               | Host feeding rate for reference body mass of 3340g                                          | grass unit * (day * rabbit) <sup>-1</sup>                     |
| $\mu_i$                | Natural mortality rate of parasite $i$ within the host                                      | days <sup>-1</sup>                                            |
| $\mu_H$                | Host natural mortality rate                                                                 | days <sup>-1</sup>                                            |
| $\delta$               | Parasite carrying-capacity                                                                  | (parasites * rabbit <sup>-1</sup> ) <sup>-1</sup>             |
| $\mu_F$                | Weather-dependent mortality rate of free-living parasites                                   | days <sup>-1</sup>                                            |
| $\alpha_0$             | Parasite baseline mortality rate in the environment associated with worm features           | days <sup>-1</sup>                                            |
| $\alpha_{1\tau}$       | Effect of temperature on mortality rate of free-living parasites                            | days <sup>-1</sup> * °C <sup>-1</sup>                         |
| $\alpha_{1h}$          | Effect of humidity on mortality rate of free-living parasites                               | days <sup>-1</sup> * units of relative humidity <sup>-1</sup> |
| $\tau(t)$              | Mean daily air temperature from min and max records                                         | °C                                                            |
| $H(t)$                 | Daily relative air humidity from dry-web bulb temperature, atmospheric pressure at 101.3kPa | %                                                             |
| $\alpha'_p$            | Parasite shedding rate * host total recruitment                                             | rabbit * (grass unit * days) <sup>-1</sup>                    |
| $r_{ii}$               | Intensity of immune response to parasite $i$ triggered by $i$                               | -                                                             |
| $r_{ji}$               | Intensity of immune response to parasite $i$ triggered by $j$                               | -                                                             |
| $k$                    | Parasite aggregation from negative binomial distribution                                    | -                                                             |

757

758 **Table 2.** Tested hypotheses and related mechanisms for single and dual infections of both  
 759 helminths with the corresponding model complexity  $p$ , indicated by the number of  
 760 parameters to be calibrated for each data subset.  
 761

| <b>Models</b> | <b>Single infection</b>                            | <b>Dual infection</b>                                           | <b>Parameter constraints</b>                              | <b><math>p</math></b> |
|---------------|----------------------------------------------------|-----------------------------------------------------------------|-----------------------------------------------------------|-----------------------|
| M0            | Parasite Birth-Death only                          | Parasite Birth-Death only                                       | $r_{ji} = 0$ for any $j$ and $i$ ;<br>$\delta_i = \infty$ | 8                     |
| M1            | Birth-Death + Specific Imm.                        | Birth-Death + Specific Imm.                                     | $r_{ji} = 0$ for $j \neq i$ ; $\delta_i = \infty$         | 9                     |
| M2            | Birth-Death + Specific Imm.<br>+ Intensity Depend. | Birth-Death + Specific Imm.<br>+ Intensity Depend.              | $r_{ji} = 0$ for $j \neq i$                               | 10                    |
| M3            | -                                                  | Birth-Death + Specific Imm. +<br>Cross Imm.                     | $\delta_i = \infty$                                       | 10                    |
| M4            | -                                                  | Birth-Death + Specific Imm. +<br>Cross Imm. + Intensity Depend. | -                                                         | 11                    |

762

763 **Table 3.** Parameter values estimated from the best-fitted model for *T. retortaeformis* (TR)  
764 and *G. strigosum* (GS) in single- (SI) and dual- (DU) infected hosts. Parameter definitions  
765 are reported in table 1.  $F(0)$  refers to the initial condition of the warm-up period of model  
766 simulations while  $\gamma$  is included as a constant value. AIC= Akaike Information Criterion  
767 value, LL= log-likelihood, RMSD= Root Mean Square Deviation.  
768

| Parameters       | TR-SI   | TR-DU   | GS-SI   | GS-DU   |
|------------------|---------|---------|---------|---------|
| $\gamma$         | 3.09    | 3.09    | 5.73    | 5.73    |
| $\Phi_0$         | 1.70    | 0.4738  | 1.84    | 0.430   |
| $\mu_i$          | 0.0040  | 0.00219 | 0.212   | 0.0161  |
| $\delta$         | 651.6   | 789.74  | 78.71   | 83.45   |
| $F(0)$           | 76.42   | 6.28    | 61.30   | 3.28    |
| $\alpha_0$       | 7.39    | 3.60    | 0.328   | 0.194   |
| $\alpha_{1\tau}$ | 0.445   | 0.207   | 0.0022  | 0.00019 |
| $\alpha_{1h}$    | -0.0003 | 0.00254 | 0.00375 | 0.00236 |
| $\alpha_p'$      | 1.86    | 3.322   | 0.129   | 0.1323  |
| $k$              | 0.220   | 0.244   | 0.146   | 0.423   |
| $r_{ii}$         | 0.734   | 0.338   | 0.1206  | 0.208   |
| $r_{ji}$         | -       | 0.00016 | -       | 0.804   |
| Parameters       | 10      | 11      | 10      | 11      |
| AIC              | 17,074  | 19,204  | 3,052   | 10,878  |
| LL               | 8,624   | 9,591   | 1,516   | 5,428   |
| RMSD             | 576     | 999     | 49.2    | 73.4    |

769

770

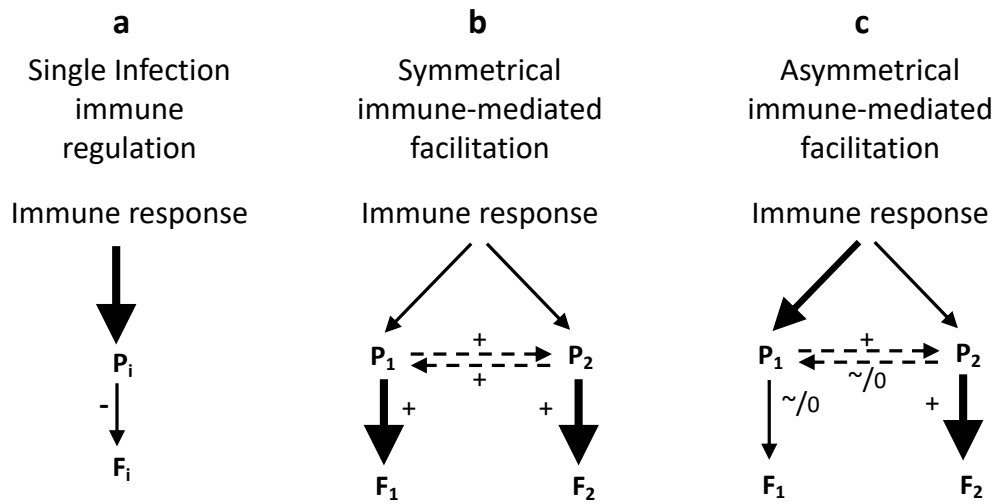

771

772 **Figure 1.** Scenarios of immune-parasite interaction in single infections (a) and dual-  
773 infections (b and c) for two parasite species ( $P_i$ ,  $i = 1, 2$ ) and consequences for their fitness  
774 ( $F_i$ ,  $i = 1, 2$ ). Symmetrical and asymmetrical immune-mediated facilitation is presented for  
775 the dual infection. We report: the magnitude (arrow thickness) and type of the effect (null=  
776 0, sub-typical= $\sim$ , positive= $+$ , negative= $-$ ) and the parasite indirect interactions (dotted  
777 arrow). **a-** Standard scenario were immunity directly affects parasite,  $P_i$ , traits (i.e.  
778 abundance, development or fecundity) and reduces its fitness,  $F_i$ ; examples: many  
779 helminth species, including *T. retortaeformis* in rabbits (Cattadori et al. 2005). **b-** Immunity  
780 decreases against each parasite,  $P_1$  and  $P_2$ , and this benefits their fitness,  $F_1$  and  $F_2$ ,  
781 compared to case a;  $P_1$ - $P_2$  interactions (e.g. positive or unclear reaction) do not reduce  
782 the positive net immune effect on  $F_1$  and  $F_2$ ; examples: hookworm and *Ascaris*  
783 *lumbricoides* in humans (Fleming et al. 2006), HIV- *Mycobacterium tuberculosis* in  
784 humans (Pawlowski et al. 2012), this study. **c-** Processes and impacts are as described  
785 in case b, however,  $P_1$ - $P_2$  asymmetrical interactions benefit the fitness  $F_2$  of  $P_2$  but lead to  
786 sub-typical ( $\sim$ ) or unclear (0) increase in fitness  $F_1$  for  $P_1$ , compared to case a; example:  
787 *Trichuris muris*-*Schistosoma mansoni* in mice (Bickle et al. 2008) or *H. polygyrus*-  
788 *Trichinella spiralis* in mice (Behnke et al. 1993).



789

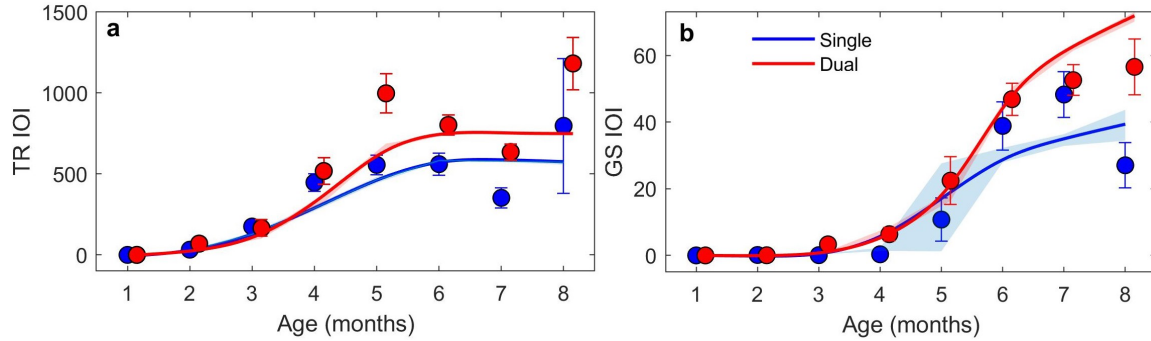

790

791

792 **Figure 2.** Relationship between intensity of infection (IOI) and host age for *T.*  
793 *retortaeformis* (TR, a) and *G. strigosum* (GS, b) in single- (blue) and dual- (red) infected  
794 hosts from population A. Mean and S.E. data are reported from individual-based model  
795 simulations (lines and shadow bands) and field monitoring (circles and bars, these latter  
796 ones calculated under the assumption that the data follow a negative binomial  
797 distribution). Only simulations referring to collected rabbit data are reported. Small S.E.  
798 bars and bands could be masked by circles or lines. IOI at age 1 is forced to start at 0  
799 since rabbits are exposed to the risk of infection at about 30 days of age when they switch  
800 from milk to herbage.

801

802

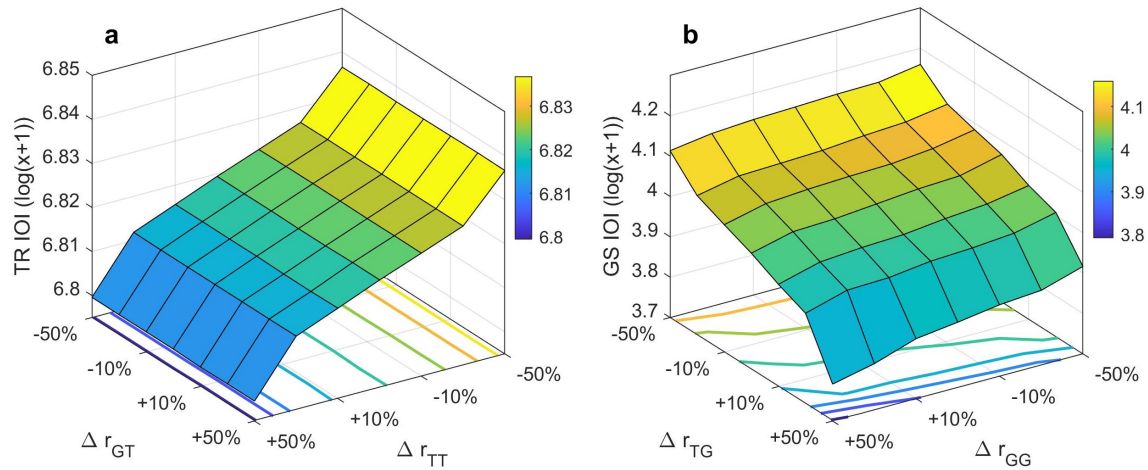

803

804

805 **Figure 3.** Three-way relationships among model-predicted intensity of infection (IOI) and  
806 relative changes in species-specific ( $\Delta r_{TT}$  or  $\Delta r_{GG}$ ) and cross-reacting ( $\Delta r_{TG}$  or  $\Delta r_{GT}$ ) stimuli  
807 to IgA production for *T. retortaeformis* (TR, a) and *G. strigosum* (GS, b). Predictions are  
808 from the selected best model for dual infections (M4) fitted on population A. The bivariate  
809 incremental variation (% of increase or decrease) in the immune parameters,  $r_{ii}$  or  $r_{ji}$ , is  
810 relative to the baseline estimated values reported in table 3. The IOIs (heat surface) are  
811 obtained via sensitivity analysis where the immune parameters are incrementally changed  
812 one at a time, with respect to their estimated values, and simulations are run while holding  
813 all the other parameters constant. The contour lines represent the predicted IOI values  
814 from the heat map at specific  $r_{ii}$  and  $r_{ji}$  values.

815

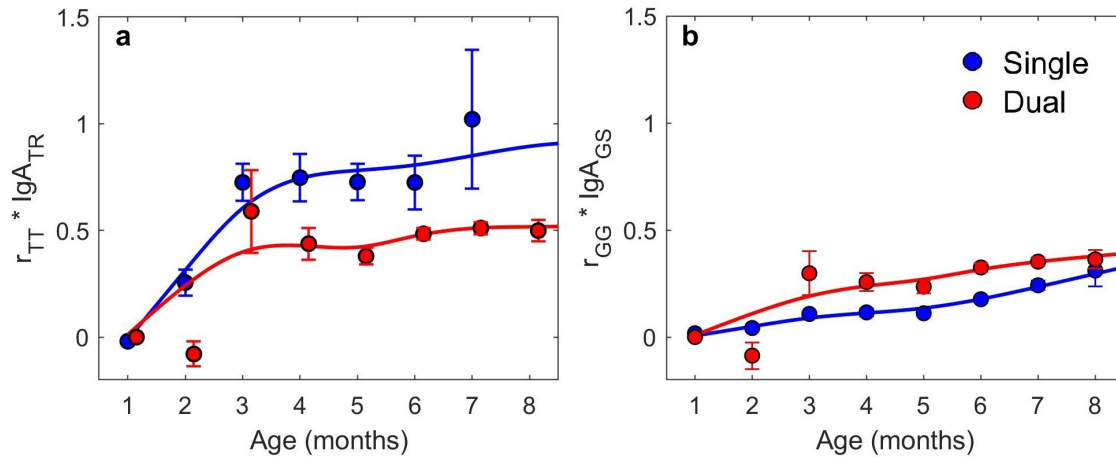

816

817

818 **Figure 4.** Relationship between the contribution of species-specific IgA response,  $r_{ii} \text{ IgA}$ ,  
819 by host age for *T. retortaeformis* (a) and *G. strigosum* (b) in single- (blue) and dual- (red)  
820 infected hosts from population A as inferred from the model. The simulated  $r_{ii} \text{ IgA}$  values  
821 (mean and S.E.) and the 4<sup>th</sup> order polynomial curves, weighted by sample size, are  
822 reported. Small S.E. are masked by the circles.

823

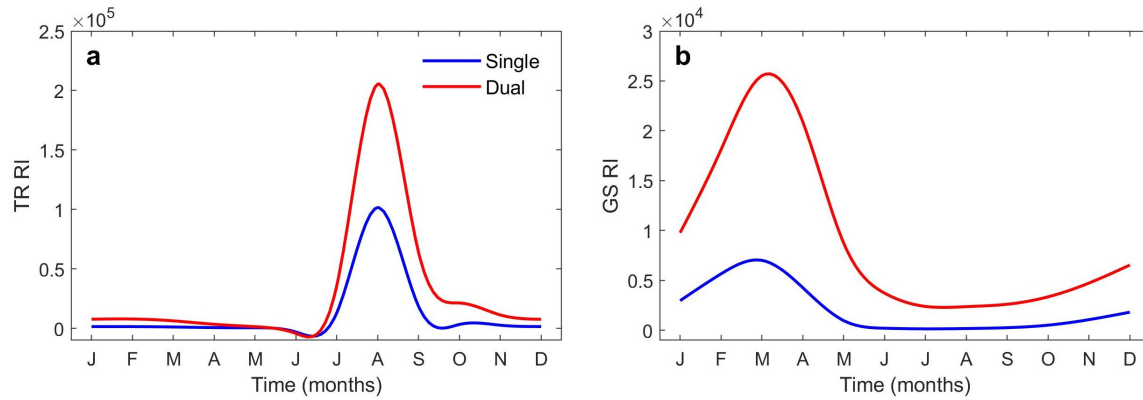

824

825

826 **Figure 5.** Estimated seasonality of the mean risk of infection (RI) by sampling month for *T.*  
827 *retortaeformis* (TR, a) and *G. strigosum* (GS, b) in single- (blue) and dual-infected (red) hosts  
828 from population A.
